# Supplementary material for: A Functional Magnetic Resonance Imaging Study of Social Cognition in Schizophrenia During an Acute Episode and After Recovery
Source: Atypon-hosted journal article supplement (doi:10.1176/ajp.2006.163.11.1926), 2006-11-01
Supplement: ajp_163_11_1926_01.pdf [file ajp_163_11_1926_01.pdf]

Data Supplement 1. Regions of Significant BOLD (blood-oxygen-level-dependent) Response Following Recovery From an Acute Episode of Schizophrenia With Control for Healthy Subjects' Activation Changes Across Scanning Times<sup>a,b</sup>

| Task and Anatomical Region<br>(Brodmann's area)    | Talairach<br>Coordinates |     |    | z    | Cluster<br>Size |
|----------------------------------------------------|--------------------------|-----|----|------|-----------------|
|                                                    | x                        | y   | z  |      |                 |
| Empathic versus social reasoning<br>judgments      |                          |     |    |      |                 |
| Anterior activations                               |                          |     |    |      |                 |
| Left medial prefrontal cortex (10/9)               | -8                       | 51  | 16 | 3.41 | 23              |
| Posterior/subcortical activations                  |                          |     |    |      |                 |
| Right posterior fusiform gyrus (19/37)             | 28                       | -66 | -8 | 3.73 | 98              |
| Right inferior/middle temporal gyrus<br>(37)       | 50                       | -51 | -3 | 3.36 | 176             |
| Left inferior parietal lobule (40)                 | -40                      | -24 | 27 | 3.31 | 44              |
| Left inferior parietal lobule (40)                 | -46                      | -43 | 26 | 3.26 | 25              |
| Right lingual gyrus (18)                           | 14                       | -72 | -1 | 3.19 | 25              |
| Right posterior cingulate (29)                     | 10                       | -48 | 19 | 3.08 | 17              |
| Forgivability versus social reasoning<br>judgments |                          |     |    |      |                 |
| Anterior activations                               |                          |     |    |      |                 |
| Right superior frontal gyrus (10)                  | 26                       | 53  | 8  | 3.49 | 17              |
| Left medial prefrontal cortex (10/9)               | -4                       | 55  | 14 | 3.38 | 32              |
| Posterior/subcortical activations                  |                          |     |    |      |                 |
| Left precuneus (7)                                 | -12                      | -46 | 48 | 3.68 | 55              |
| Left posterior middle temporal gyrus<br>(37)       | -50                      | -56 | -1 | 3.37 | 88              |
| Left paracentral lobule (6/31)                     | -6                       | -13 | 47 | 3.22 | 35              |
| Left superior temporal gyrus (41)                  | -51                      | -21 | 3  | 3.22 | 13              |
| Left cuneus (18)                                   | -14                      | -96 | 12 | 3.49 | 18              |

<sup>a</sup>For patients, second versus first scans. For comparison subjects, second versus first scans.

<sup>b</sup>A left medial prefrontal area (Brodmann's area 10/9) was improved in activation in response to both empathic and forgivability tasks following recovery of schizophrenia. Areas of activation exceeding the threshold ( $p < 0.005$ , uncorrected) and extent threshold 10 voxels were presented.

Data Supplement 2. Regions of Significant Blood-Oxygen-Level-Dependent Response to Empathic Versus Social Reasoning Judgments in Comparison and Schizophrenia Subjects<sup>a</sup>

| Scan Time, Group, and Anatomical Region<br>(Brodmann's area) | Talairach<br>Coordinates |     |     | z    | Cluster<br>Size |
|--------------------------------------------------------------|--------------------------|-----|-----|------|-----------------|
|                                                              | x                        | y   | z   |      |                 |
| Time 1                                                       |                          |     |     |      |                 |
| Healthy comparison subjects                                  |                          |     |     |      |                 |
| Anterior activations                                         |                          |     |     |      |                 |
| Left superior/medial prefrontal cortex (10)                  | -12                      | 63  | 15  | 4.80 | 170             |
| Left inferior frontal gyrus (45)                             | -55                      | 24  | 12  | 4.35 | 81              |
| Right medial prefrontal cortex (10)                          | 10                       | 63  | 12  | 3.70 | 39              |
| Right inferior frontal gyrus (45)                            | 58                       | 22  | 20  | 3.45 | 19              |
| Posterior/subcortical activations                            |                          |     |     |      |                 |
| Precuneus (7)                                                | -2                       | -58 | 43  | 5.25 | 1,254           |
| Cuneus (19)                                                  | 28                       | -88 | 23  | 4.20 | 33              |
| Left inferior parietal/angular gyrus (39)                    | -51                      | -64 | 35  | 3.84 | 212             |
| Right posterior fusiform gyrus (19)                          | 28                       | -68 | 10  | 3.59 | 153             |
| Left middle/inferior temporal gyrus (21)                     | -56                      | -8  | -16 | 3.42 | 60              |
| Right middle temporal gyrus (21)                             | 60                       | -7  | -18 | 3.42 | 29              |
| Thalamus                                                     | -6                       | -11 | -15 | 3.27 | 13              |
| Patients with schizophrenia                                  |                          |     |     |      |                 |
| Anterior activations                                         |                          |     |     |      |                 |
| Right middle frontal gyrus (46)                              | 46                       | 45  | 16  | 3.91 | 50              |
| Left medial prefrontal cortex (10)                           | -2                       | 61  | 8   | 3.38 | 48              |
| Posterior/subcortical activations                            |                          |     |     |      |                 |
| Left superior temporal gyrus (22)                            | -61                      | -40 | 15  | 3.47 | 60              |
| Left precuneus (7)                                           | -12                      | -56 | 36  | 3.19 | 28              |
| Left lingual gyrus (17)                                      | -4                       | -87 | 3   | 3.16 | 21              |
| Schizophrenia patients less than comparison subjects         |                          |     |     |      |                 |
| Left superior/medial prefrontal cortex (8)                   | -12                      | 43  | 37  | 3.44 | 14              |
| Right inferior temporal gyrus (19)                           | 50                       | -64 | -3  | 3.59 | 31              |
| Thalamus                                                     | -10                      | -9  | 12  | 3.34 | 36              |
| Right posterior fusiform gyrus (19)                          | 26                       | -66 | -8  | 3.31 | 17              |
| Precuneus (7)                                                | -8                       | -52 | 43  | 3.05 | 16              |
| Left middle/inferior temporal gyrus (20)                     | -56                      | -7  | -20 | 3.00 | 13              |
| Time 2                                                       |                          |     |     |      |                 |
| Healthy comparison subjects                                  |                          |     |     |      |                 |
| Anterior activations                                         |                          |     |     |      |                 |
| Left superior frontal/medial prefrontal cortex (8)           | -4                       | 41  | 48  | 3.99 | 76              |

|                                                      |     |     |     |      |     |
|------------------------------------------------------|-----|-----|-----|------|-----|
| Left superior frontal gyrus (9)                      | -2  | 60  | 28  | 3.62 | 43  |
| Left medial prefrontal cortex (10)                   | -2  | 53  | 5   | 3.08 | 17  |
| Posterior/subcortical activations                    |     |     |     |      |     |
| Left inferior parietal/angular gyrus (39)            | -48 | -62 | 38  | 4.50 | 178 |
| Posterior cingulate gyrus/precuneus (31, 7)          | -2  | -60 | -28 | 3.98 | 403 |
| Left middle occipital gyrus (18)                     | -18 | -97 | 14  | 3.87 | 59  |
| Right middle temporal gyrus (20)                     | 55  | -35 | -10 | 3.03 | 17  |
| Patients with schizophrenia                          |     |     |     |      |     |
| Right anterior fusiform gyrus (37)                   | 50  | -47 | -14 | 3.34 | 15  |
| Caudate                                              | -12 | 3   | 20  | 3.30 | 14  |
| Midbrain                                             | 4   | -26 | -21 | 3.22 | 18  |
| Schizophrenia patients less than comparison subjects |     |     |     |      |     |
| Right middle frontal gyrus (10)                      | 34  | 41  | 9   | 3.35 | 46  |
| Left middle frontal gyrus (10)                       | -42 | 43  | 11  | 3.08 | 17  |
| Corpus callosum                                      | -2  | -33 | 7   | 3.37 | 37  |
| Thalamus                                             | -2  | -5  | 9   | 3.07 | 51  |
| Precuneus (7)                                        | 2   | -70 | 50  | 3.02 | 11  |

<sup>a</sup>Areas of activation exceeding the threshold ( $p < 0.005$ , uncorrected) and extent threshold of 10 voxels are shown.

Data Supplement 3. Regions of Significant Blood-Oxygen-Level-Response to Forgivability Versus Social Reasoning Judgments in Comparison and Schizophrenia Subjects<sup>a</sup>

| Scan Time, Group and Anatomical Region<br>(Brodmann's area) | Talairach<br>Coordinates |     |     | z    | Cluster<br>Size |
|-------------------------------------------------------------|--------------------------|-----|-----|------|-----------------|
|                                                             | x                        | y   | z   |      |                 |
| Time 1                                                      |                          |     |     |      |                 |
| Healthy comparison subjects                                 |                          |     |     |      |                 |
| Anterior activations                                        |                          |     |     |      |                 |
| Left superior frontal gyrus (8)                             | -16                      | 45  | 38  | 4.64 | 171             |
| Right superior frontal gyrus (9)                            | 22                       | 42  | 31  | 3.99 | 66              |
| Bilateral medial prefrontal cortex (10)                     | -6                       | 59  | 21  | 3.79 | 387             |
| Right middle frontal gyrus (8)                              | 32                       | 33  | 41  | 3.61 | 17              |
| Posterior/subcortical activations                           |                          |     |     |      |                 |
| Posterior cingulate (23)                                    | -4                       | -47 | 24  | 5.01 | 962             |
| Cuneus (17/19)                                              | -22                      | -93 | -2  | 4.04 | 78              |
| Thalamus                                                    | -4                       | -33 | 3   | 3.88 | 102             |
| Right lingual/posterior fusiform gyrus<br>(18/19)           | 8                        | -82 | -13 | 3.82 | 385             |
| Left inferior parietal/angular gyrus (39)                   | -50                      | -59 | 34  | 3.13 | 42              |
| Patients with schizophrenia                                 |                          |     |     |      |                 |
| Anterior activations                                        |                          |     |     |      |                 |
| Left medial prefrontal cortex (10)                          | -6                       | 47  | 9   | 3.93 | 61              |
| Left medial prefrontal cortex (6)                           | -2                       | 43  | 35  | 3.18 | 56              |
| Right inferior frontal gyrus (47)                           | 42                       | 29  | 2   | 3.30 | 91              |
| Posterior/subcortical activations                           |                          |     |     |      |                 |
| Globus pallidus                                             | 12                       | -6  | 6   | 3.65 | 83              |
| Midbrain                                                    | -14                      | -14 | -14 | 3.55 | 30              |
| Right posterior middle temporal gyrus<br>(39)               | 51                       | -63 | 22  | 3.47 | 59              |
| Posterior cingulate (31)                                    | -2                       | -25 | 34  | 3.46 | 27              |
| Precuneus (7)                                               | -2                       | -68 | 37  | 3.36 | 137             |
| Thalamus                                                    | 6                        | -13 | 12  | 3.35 | 36              |
| Schizophrenia patients less than<br>comparison subjects     |                          |     |     |      |                 |
| Left superior frontal gyrus (9)                             | -14                      | 52  | 25  | 3.05 | 14              |
| Right posterior fusiform gyrus (19)                         | 22                       | -66 | -8  | 3.60 | 74              |
| Globus pallidus                                             | 8                        | -2  | 0   | 3.30 | 12              |
| Left occipital lingual gyrus (19)                           | -8                       | -58 | -2  | 3.05 | 20              |
| Time 2                                                      |                          |     |     |      |                 |
| Healthy comparison subjects                                 |                          |     |     |      |                 |
| Anterior activations                                        |                          |     |     |      |                 |
| Midline medial prefrontal cortex (10)                       | 0                        | 57  | 19  | 4.32 | 305             |
| Left superior/middle frontal gyrus (10)                     | -20                      | 50  | 23  | 3.53 | 45              |

|                                                      |     |     |     |      |       |
|------------------------------------------------------|-----|-----|-----|------|-------|
| Left medial prefrontal cortex (8)                    | -2  | 47  | 40  | 3.46 | 58    |
| Anterior cingulate (32)                              | -6  | 41  | 13  | 3.27 | 17    |
| Posterior/subcortical activations                    |     |     |     |      |       |
| Posterior cingulate/thalamus (31)                    | 6   | -51 | 25  | 4.51 | 1,025 |
| Right middle occipital gyrus (18)                    | 36  | -78 | -8  | 3.50 | 47    |
| Posterior cerebellum                                 | -40 | -63 | -22 | 3.29 | 12    |
| Left inferior parietal/angular gyrus (39)            | -51 | -64 | 33  | 3.02 | 20    |
| Posterior cingulate gyrus (23)                       | 0   | -16 | 32  | 3.01 | 19    |
| Patients with schizophrenia                          |     |     |     |      |       |
| Left medial prefrontal cortex (8)                    | -4  | 41  | 39  | 3.17 | 10    |
| Left medial prefrontal cortex (10)                   | -4  | 49  | 10  | 3.10 | 64    |
| Midbrain                                             | -2  | -4  | -3  | 3.11 | 20    |
| Schizophrenia patients less than comparison subjects |     |     |     |      |       |
| Right middle frontal gyrus (9)                       | 50  | 27  | 32  | 3.41 | 33    |
| Right inferior frontal gyrus (47)                    | 44  | 21  | -14 | 3.22 | 44    |
| Left middle frontal gyrus (6)                        | -40 | 4   | 44  | 3.20 | 25    |
| Left middle frontal gyrus (9)                        | -44 | 31  | 28  | 3.08 | 20    |
| Thalamus                                             | 4   | -19 | 12  | 4.32 | 372   |
| Posterior cingulate gyrus (31)                       | 8   | -43 | 32  | 3.46 | 30    |

<sup>a</sup>Areas of activation exceeding threshold ( $p < 0.005$ , uncorrected) and extent threshold 10 voxels are shown.
